# Supplementary material for: Healthcare workers knowledge, attitudes, and practices towards antimicrobial resistance in sub-Saharan Africa: a systematic review and meta-analysis
Source: Research Square preprint supplement (doi:10.21203/rs.3.rs-7410516/v1), 2025-08-26
Supplement: Supplementary file 1 [file 2cd51aac0167558a80a4fc3a.docx]

Subgroup analysis of HCW knowledge attitude and practice by SSA region, Study setting and clinical experience


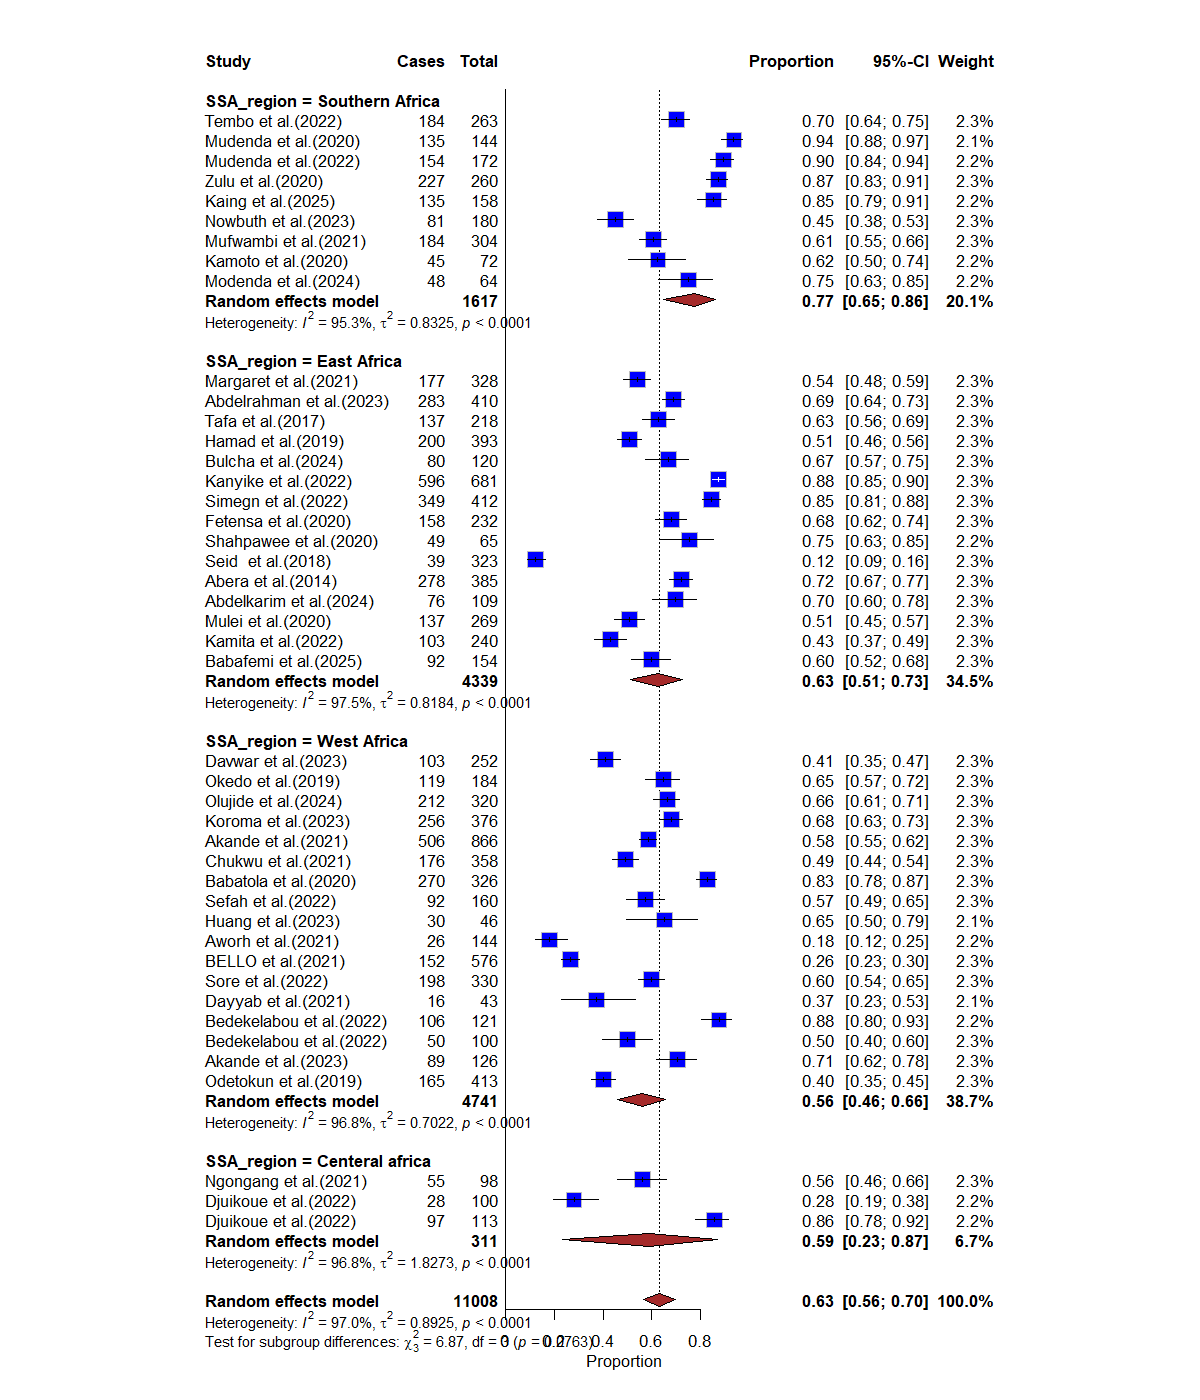


Supplementary Fig.1 subgroup analysis for knowledge based on SSA region


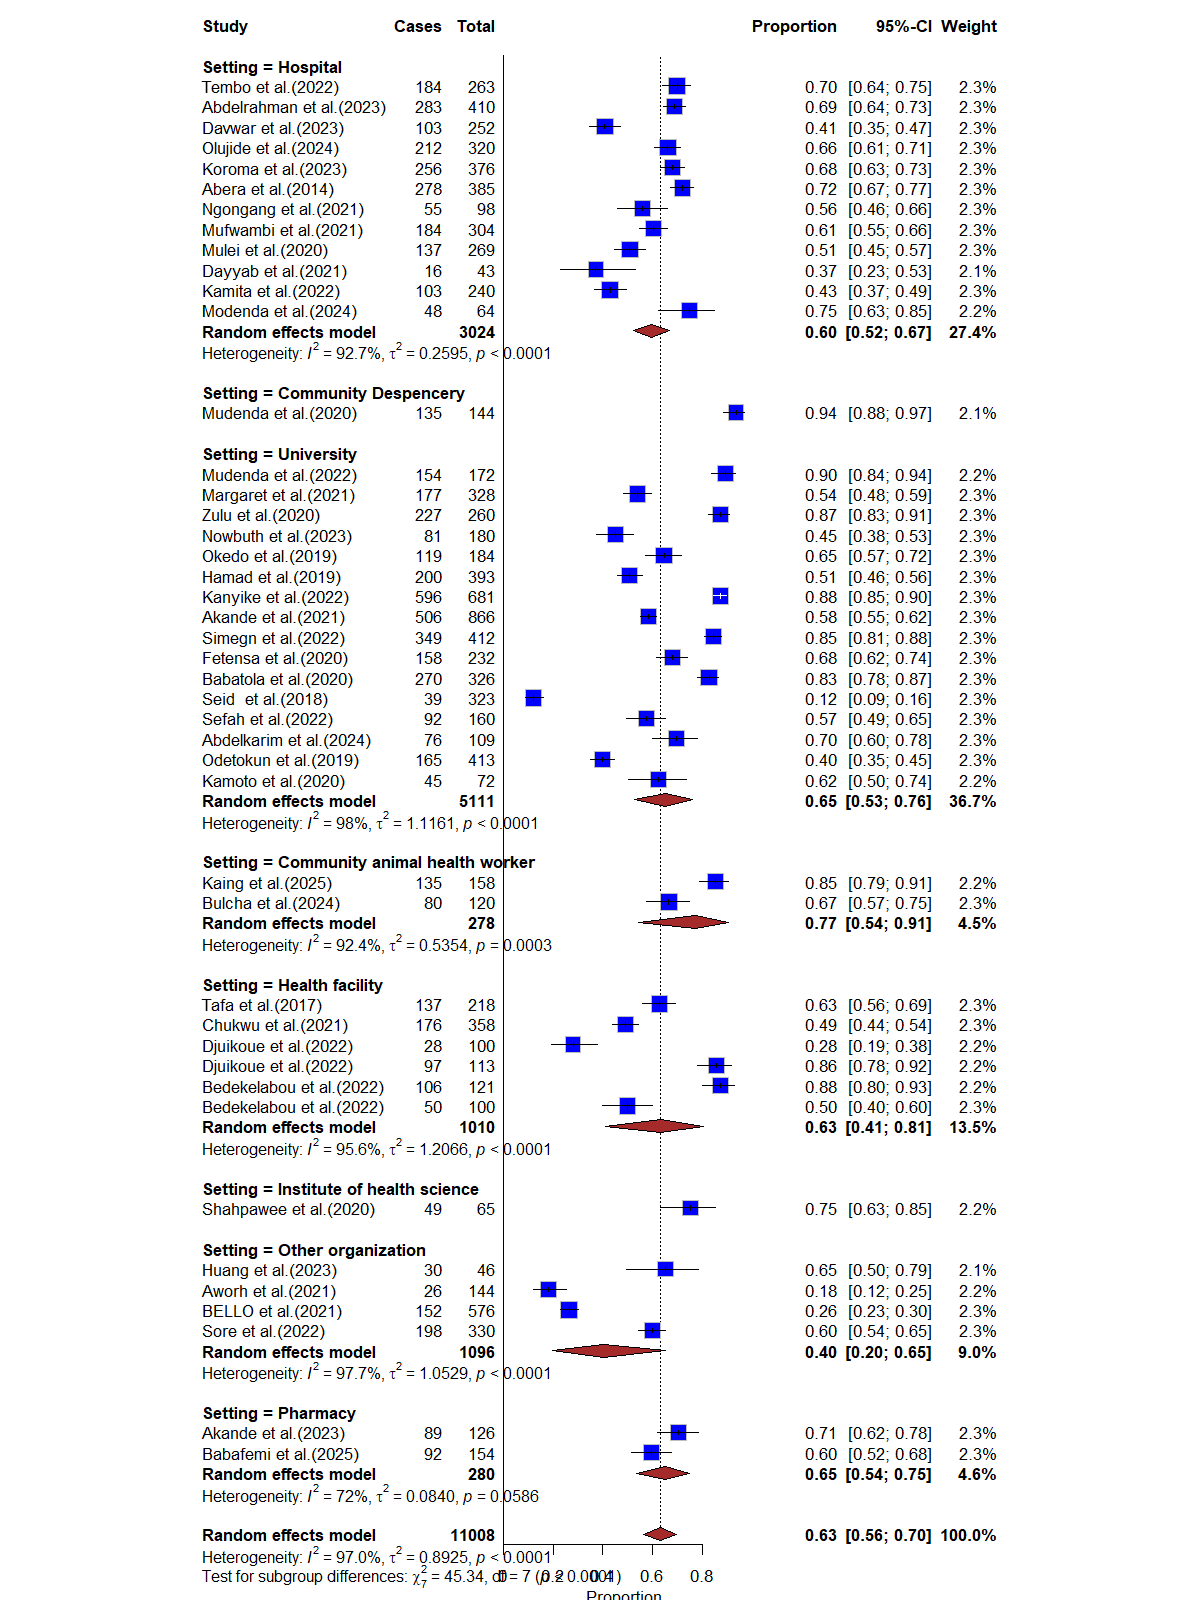


Supplementary Fig.2. subgroup analysis for knowledge based on study setting


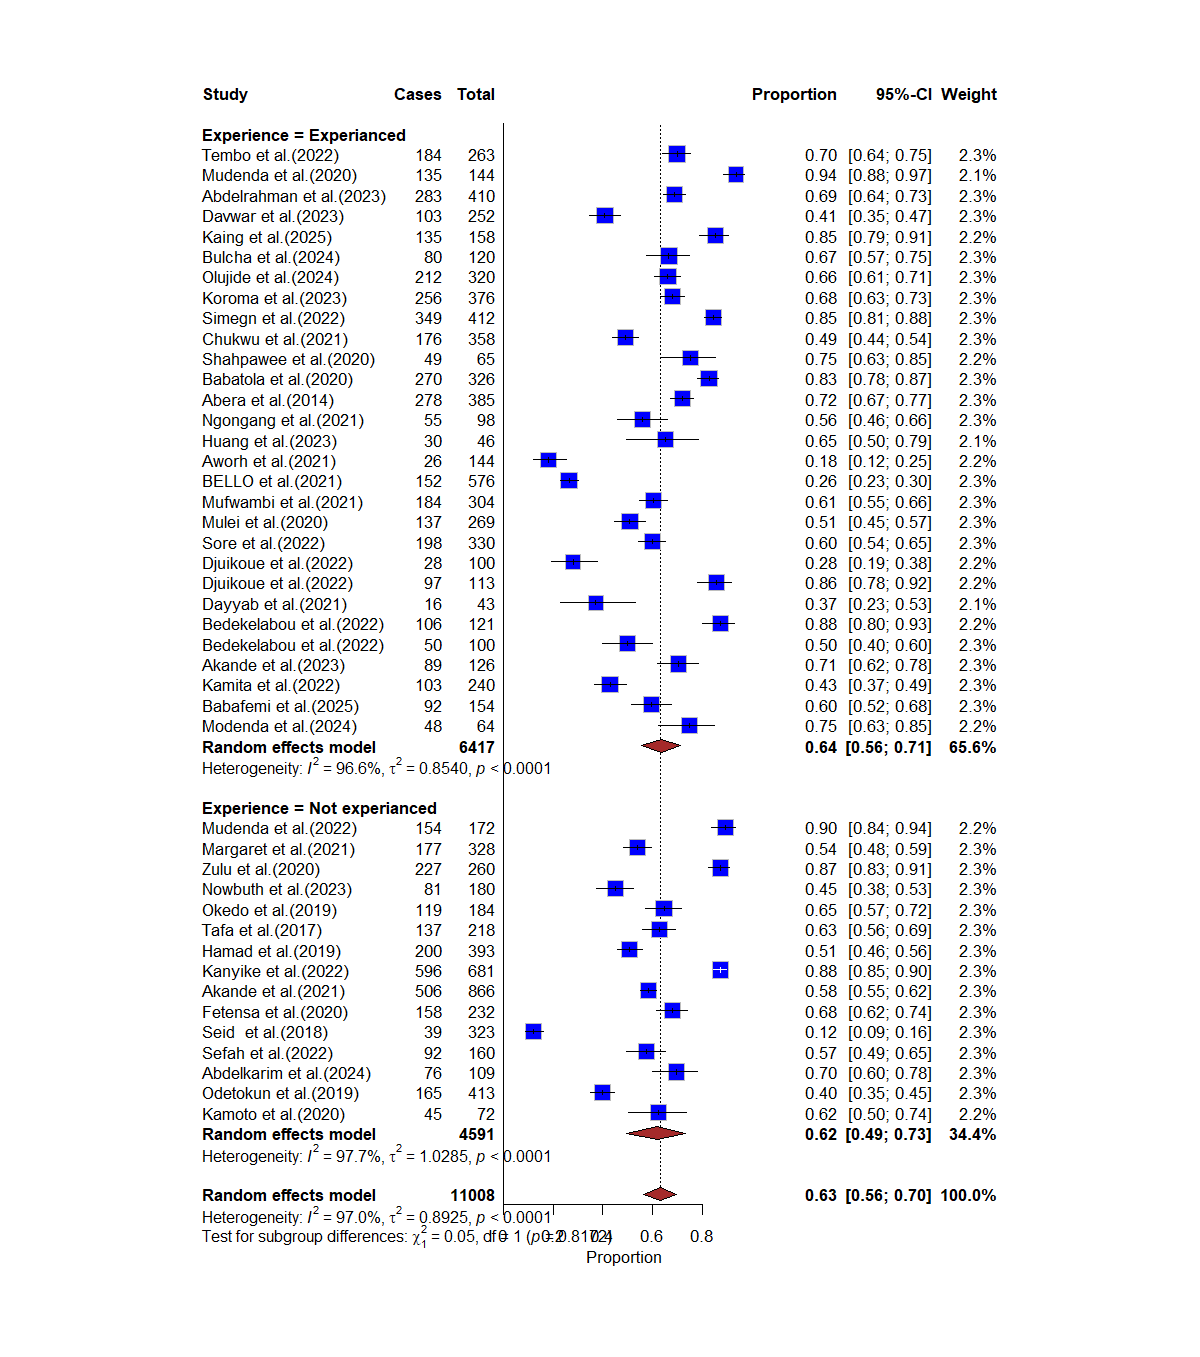


Supplementary Fig.3. subgroup analysis for knowledge based on HCWs experience


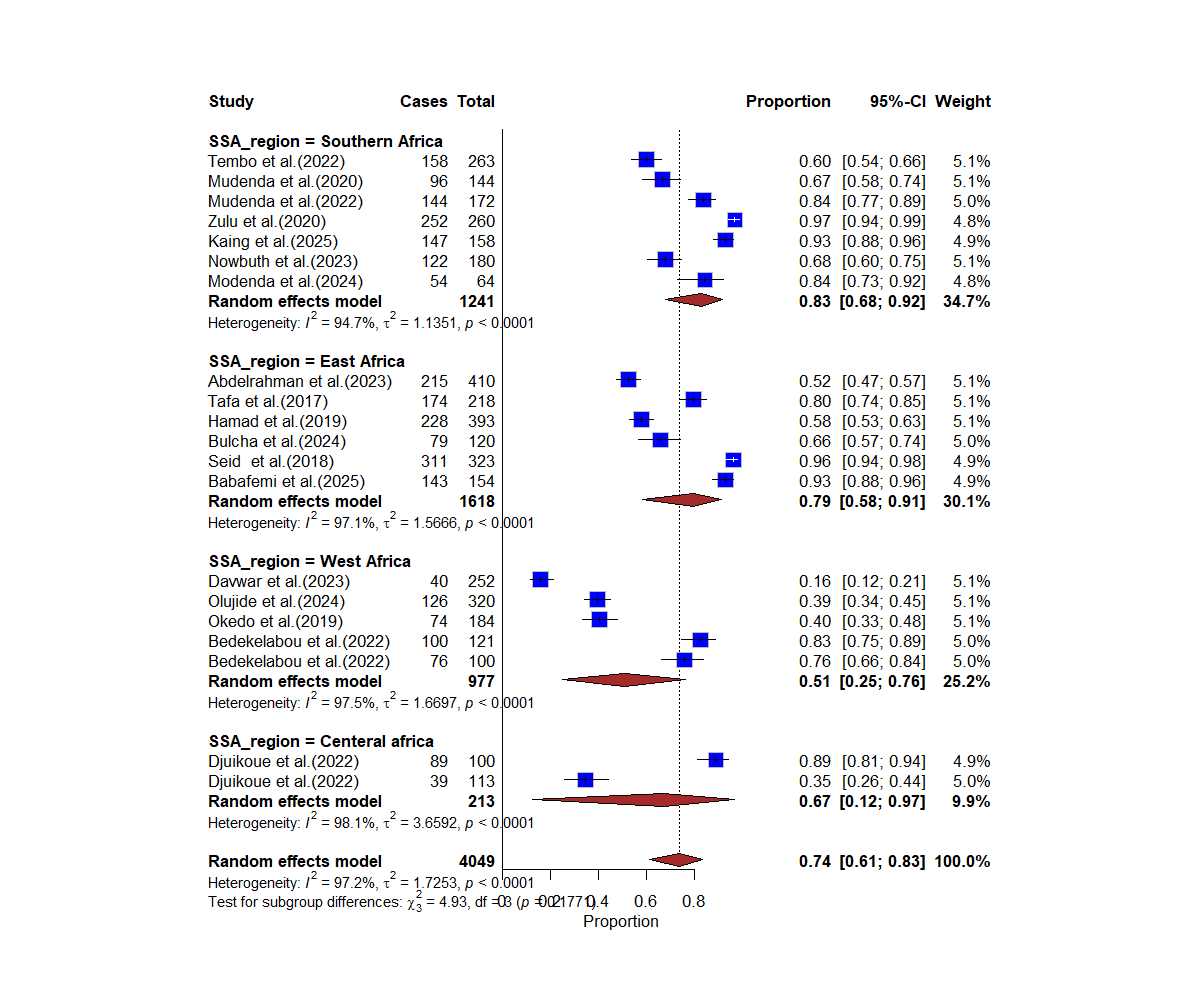


Supplementary Fig.4 Subgroup analysis for positive attitude based on SSA region


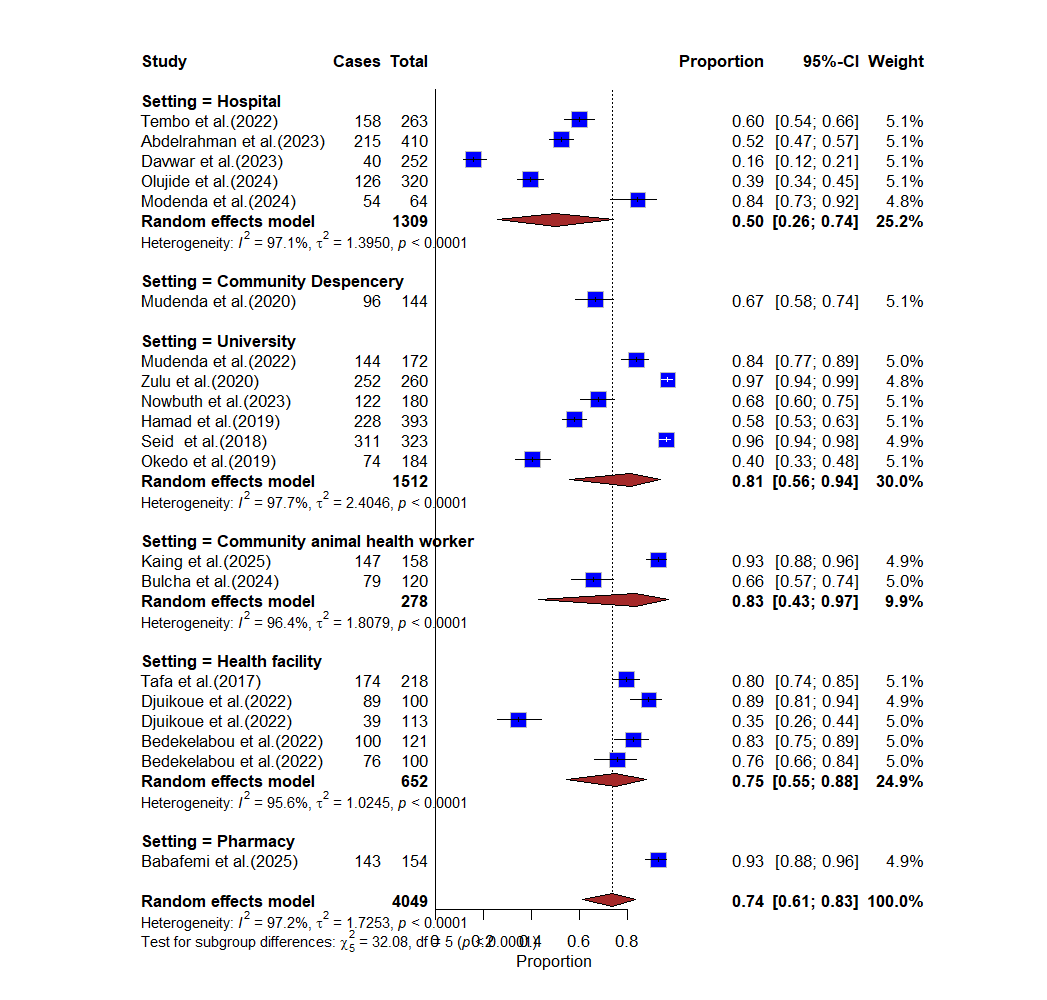


Supplementary Fig.5. Subgroup analysis for positive attitude based by study setting, and HCWs experience


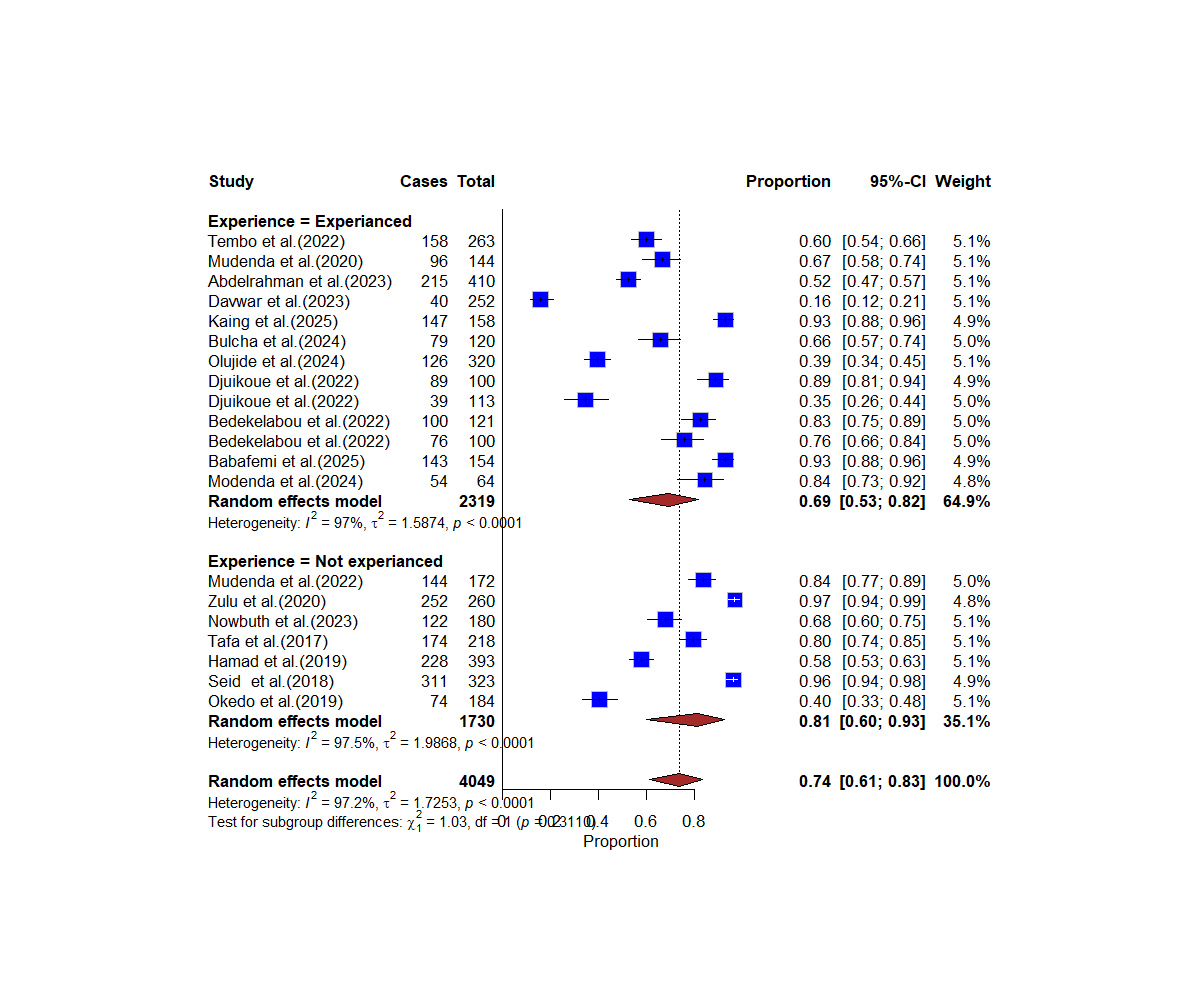


Supplementary Fig. 6. Subgroup analysis for positive attitude based by HCWs experience


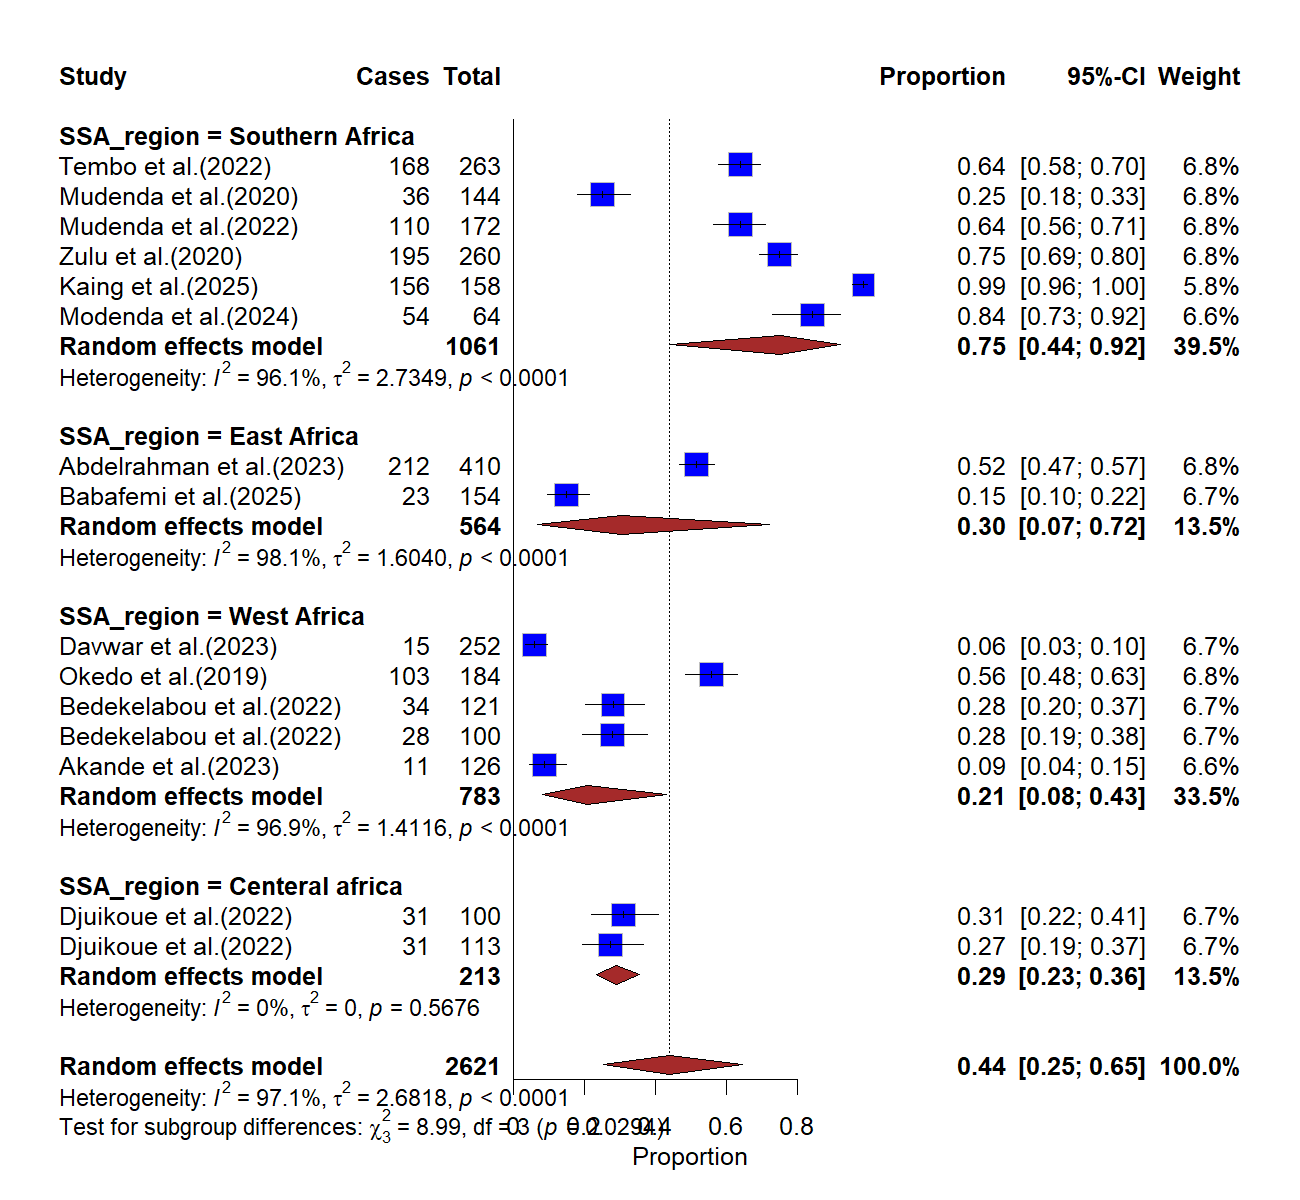


Supplementary Fig. 7. Subgroup analysis for good prevention practice by HCWs SSA region


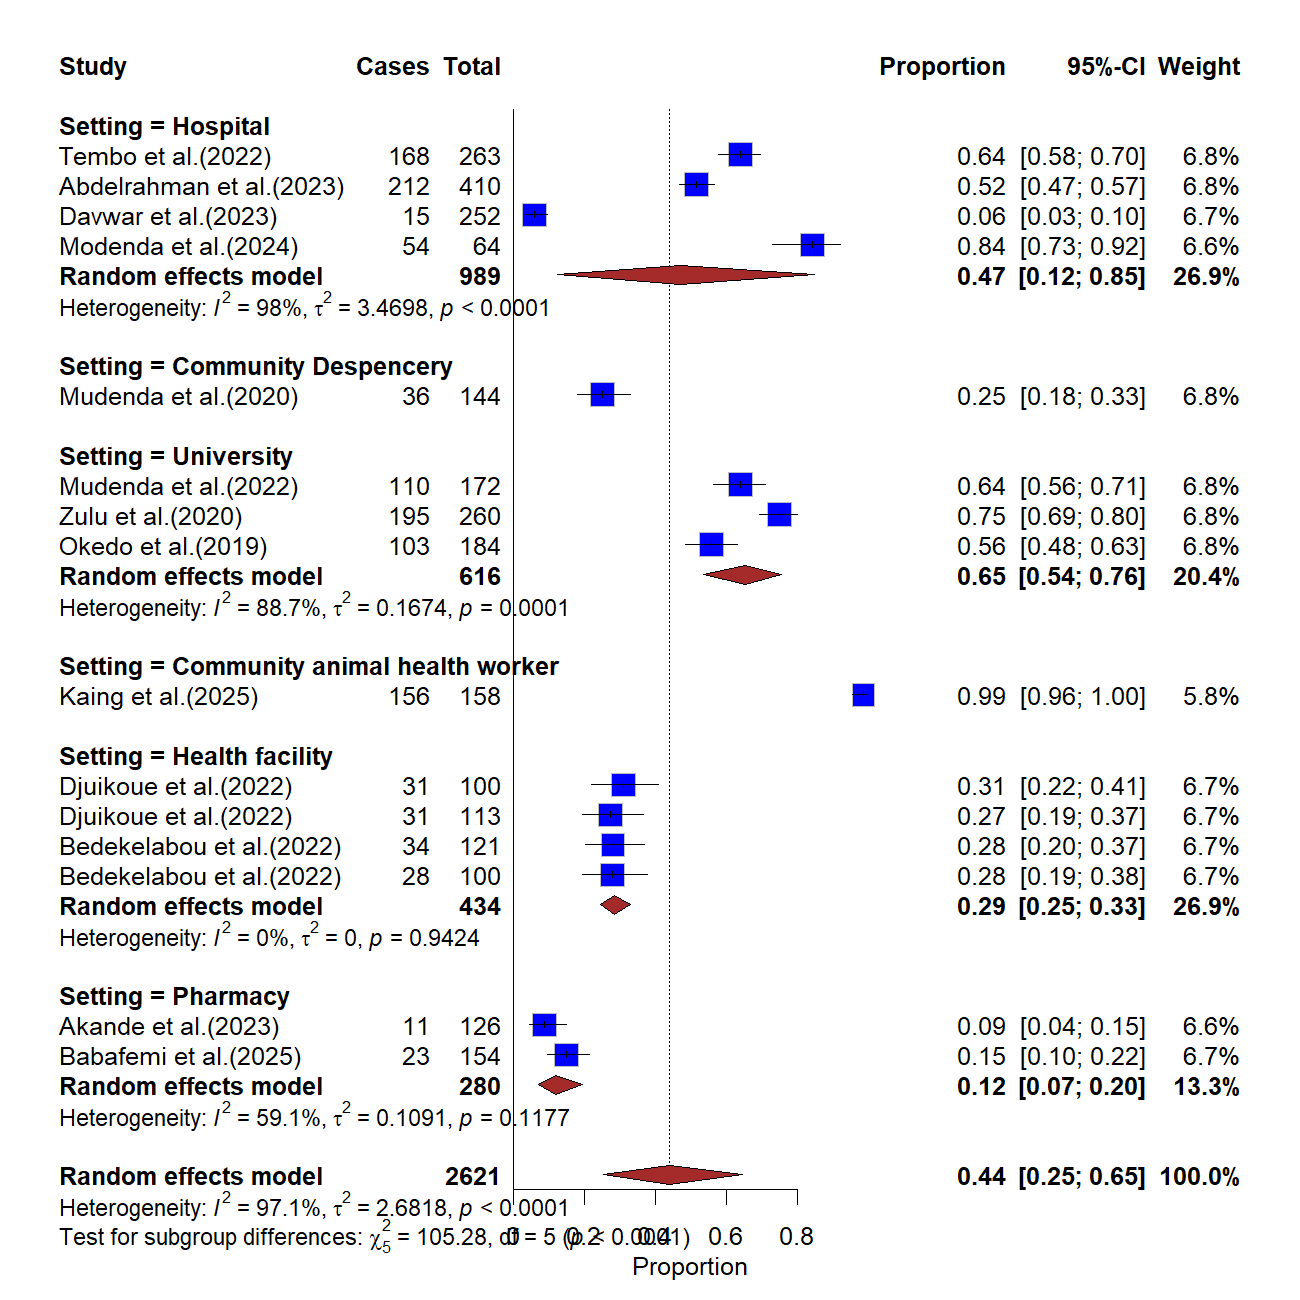


Supplementary Fig. 7. Subgroup analysis for good prevention practice of HCWs by study setting.


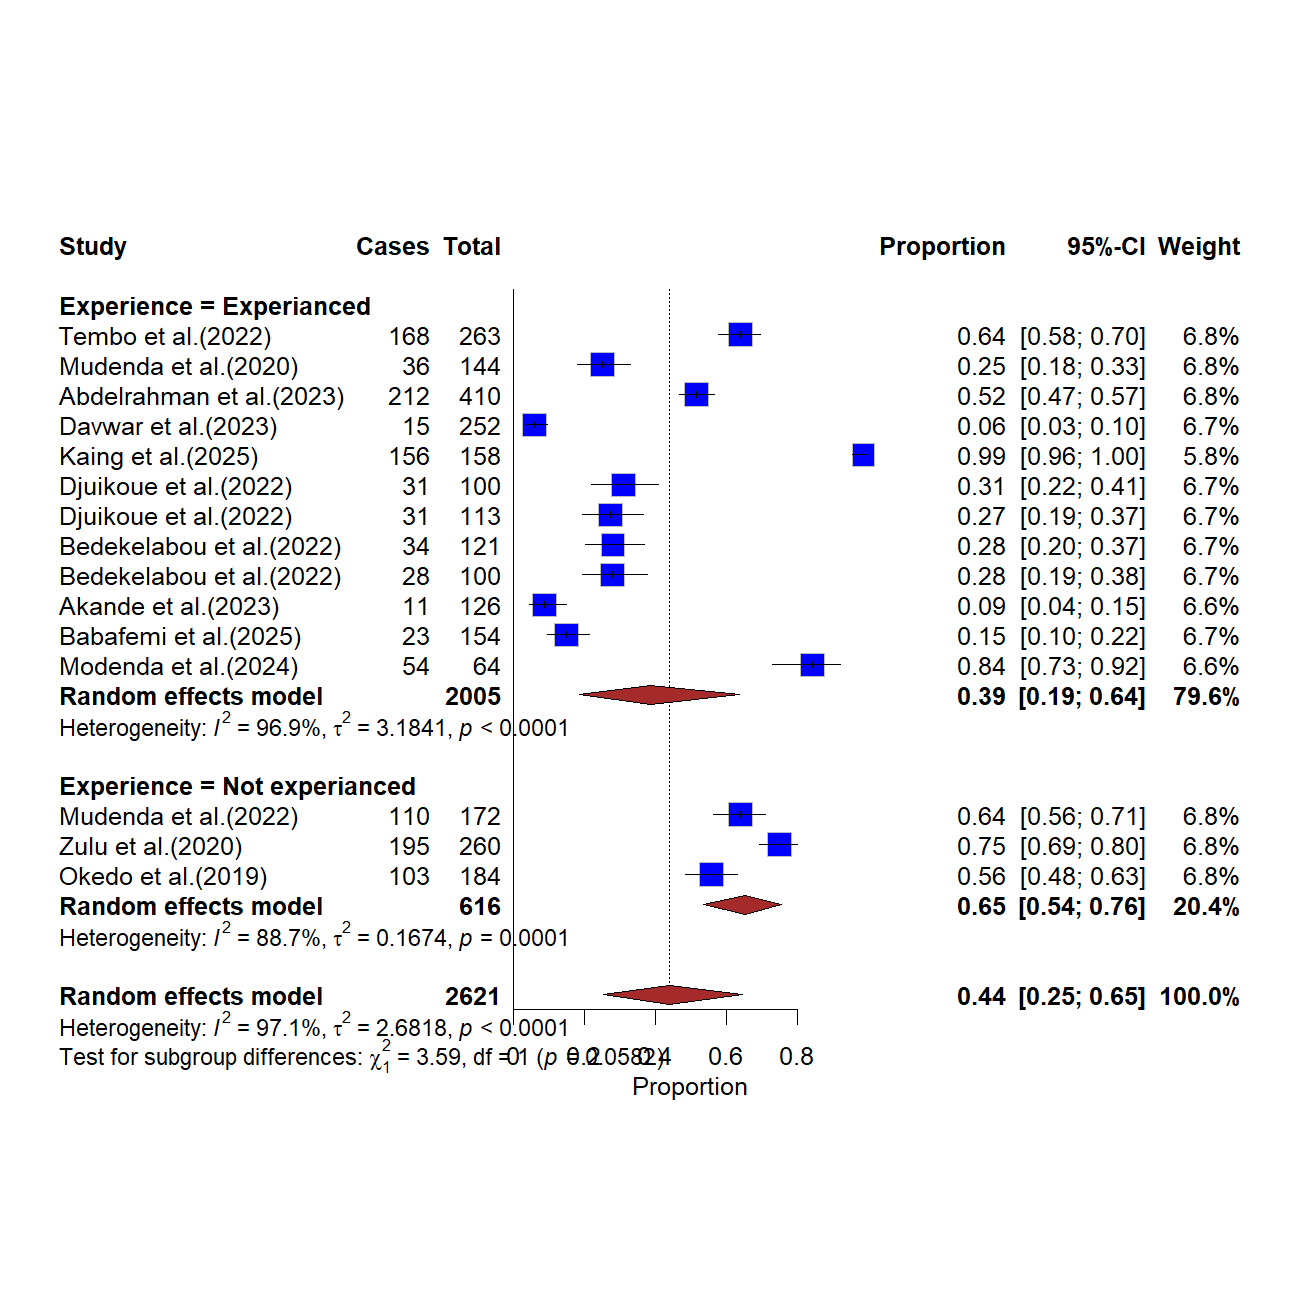


Supplementary Fig. 7. Subgroup analysis for good prevention practice of HCWs by their clinical experiance
