# Supplementary material for: Healthcare workers knowledge, attitudes, and practices towards antimicrobial resistance in sub-Saharan Africa: a systematic review and meta-analysis
Source: Research Square preprint supplement (doi:10.21203/rs.3.rs-7410516/v1), 2025-08-26
Supplement: Supplementary file 2 [file 3a5579fbb96a21a6b942c20f.xlsx]

## Sheet: Sheet2
Outcome	Brouping variable	Subgroup	No of studies	Number of participant	Prevalence (95%CI)	Heterogeneity χ²	P-value	I² (%)	Tau²
Knowledge	SSA region	Southern Africa	9	1617	77 [65; 86]	6.7	0.07	95.3	0.8325
		East Africa	15	4339	63 [51; 73]			97.5	0.8184
		Centeral africa	3	311	59 [23; 87]			96.9	1.8273
		West Africa	17	4741	56 [46; 66]			96.9	0.7022
	Setting	Hospital	12	3024	60 [52; 67]	45.34	<0.0001	92.7	0.2595
		community dispencery	1	144	94 [88; 97]			N/A	N/A
		Health facility	6	1010	63 [41; 81]			95.6	1.2066
		Institute of health science	1	65	75 [63; 85]			N/A	N/A
		Other organization	4	1096	40 [20; 65]			97.7	1.0529
		Pharmacy	2	280	65 [54; 75]			72	0.084
	HCWs Experience	Experianced	29	6417	64 [56; 71]		0.081	96.6	0.854
		Not experianced	15	4591	62 [49; 73]			97.7	0.892
Atitude	SSA region	Southern Africa	7	1241	83 [68; 92]	4.93	0.177	94.7	1.1351
		East Africa	6	1618	79 [58; 91]			97.1	1.5666
		Centeral africa	2	213	67 [12; 97]			98.1	3.6592
		West Africa	5	977	51 [25; 76]			97.5	1.6697
	Setting	Hospital	5	1309	50 [26; 74]	32.08	< 0.0001	97.1	1.395
		community dispencery	1	144	67 [58; 74]			N/A	N/A
		Health facility	5	652	75 [55; 88]			95.6	1.0245
		Pharmacy	1	154	93 [88; 96]			N/A	N/A
	HCWs Experience	Experianced	13	2319	69 [53; 82]	1.03	0.31	97	1.587
		Not experianced	7	1730	81 [60;93]			97.5	1.986
Practice	SSA region	Southern Africa	6	1061	75 [44; 92]	8.99	0.0029	96.1	2.7349
		East Africa	2	564	30 [7; 72]			98.1	1.604
		Centeral africa	2	213	29 [23; 36]			0	0
		West Africa	5	783	21 [8; 43]			96.9	1.4116
	Setting	Hospital	4	989	47 [12; 85]	105.28	<0.0001	98	3.4698
		community dispencery	1	144	25 [18; 33]			N/A	N/A
		Health facility	4	434	29 [25; 33]			0	0
		Pharmacy	2	280	12 [7; 20]			59.1	0.1091
	HCWs Experience	Experianced	12	2005	39 [19; 64]	3.59	0.0058	96.9	3.184
		Not experianced	3	616	45 [25; 65]			88.7	0.167
Subgroup mean difference
