# Supplementary material for: Healthcare workers knowledge, attitudes, and practices towards antimicrobial resistance in sub-Saharan Africa: a systematic review and meta-analysis
Source: Research Square preprint supplement (doi:10.21203/rs.3.rs-7410516/v1), 2025-08-26
Supplement: Supplementary file 3 [file 4738b20d4bfca60c980c3542.xlsx]

## Sheet: Table3
Outcome	possible source of Heterogeneity tested	Univariant meta regression	P=value	Association
		Coefficient (95%CI)
Knowledge	Sample Size	-0.003(0.002,0.0014)	0.7209	No
	Year	0.0666 (-0.0699, 0.2030)	0.339	No
Attitude	Sample Size	-0.0024 (-0.0085,0.0037)	0.4363	No
	Year	-0.0534 (-0.3221,0.2154)	0.6971	No
Practice	Sample Size	0.0012 (-0.0089,0.0113)	0.8192	No
	Year	0.1128 (-0.4196,0.6451)	0.6781	No
