# Supplementary material for: Healthcare workers knowledge, attitudes, and practices towards antimicrobial resistance in sub-Saharan Africa: a systematic review and meta-analysis
Source: Research Square preprint supplement (doi:10.21203/rs.3.rs-7410516/v1), 2025-08-26
Supplement: Supplementary file 4 [file 72e678f23dd09110bc6bd1af.xlsx]

## Sheet: Sheet1
ID	Author	Year	Study country	SSA_region	Study design	Setting	Experience	Population type	Total	Good level of knowledge %	Positive Attitude %	Good practice%	Study quality
1	Tembo et al.(2022)	2022	Zambia	Southern Africa	cross-sectional	Hospital	Experianced	pharmacy personnel and nurses	263	70	60	64	Low risk
2	Mudenda et al.(2020)	2020	Zambia	Southern Africa	cross-sectional	Community Despencery	Experianced	community pharmacies	144	93.8	67	25	Low risk
3	Mudenda et al.(2022)	2022	Zambia	Southern Africa	cross-sectional	University	Not experianced	pharmacy students	172	90	84	64	Low risk
4	Margaret et al.(2021)	2021	East Africa	East Africa	cross-sectional	University	Not experianced	medical and pharmacy student	328	54	NR	NR	Low risk
9	Zulu et al.(2020)	2020	Zambia	Southern Africa	cross-sectional	University	Not experianced	medical students	260	87.3	96.9	75	Low risk
13	Abdelrahman et al.(2023)	2023	Somalia	East Africa	cross-sectional	Hospital	Experianced	pharmacists	410	69	52.4	51.7	Low risk
15	Davwar et al.(2023)	2023	Nigeria	West Africa	cross-sectional	Hospital	Experianced	Doctors	252	41	16	6	Low risk
21	Kaing et al.(2025)	2025	Malavi	Southern Africa	cross-sectional	Community animal health worker	Experianced	Veterinary drug dispensers	158	85.5	92.8	98.6	Low risk
23	Nowbuth et al.(2023)	2023	Zambia	Southern Africa	cross-sectional	University	Not experianced	medical students	180	45	68	NR	Low risk
24	Okedo et al.(2019)	2019	Nigeria	West Africa	cross-sectional	University	Not experianced	medical students	184	64.7	NR	56	Low risk
26	Tafa et al.(2017)	2017	Ethiopia	East Africa	cross-sectional	Health facility	Not experianced	Paramedical staffs	218	62.8	80	NR	Low risk
31	Hamad et al.(2019)	2019	Sudan	East Africa	cross-sectional	University	Not experianced	medical, pharmacy, and nursing student	393	51	58	NR	Low risk
32	Bulcha et al.(2024)	2024	Ethiopia	East Africa	cross-sectional	Community animal health worker	Experianced	animal health professional	120	66.88	66.17	NR	Low risk
33	Olujide et al.(2024)	2024	Nigeria	West Africa	cross-sectional	Hospital	Experianced	HCWs	320	66.3	39.4	NR	Low risk
37	Kanyike et al.(2022)	2022	Uganda	East Africa	cross-sectional	University	Not experianced	clinical health professions students	681	87.5	NR	NR	Low risk
38	Koroma et al.(2023)	2023	Sierra Leone	West Africa	cross-sectional	Hospital	Experianced	medical professionals	376	68	NR	NR	Low risk
41	Akande et al.(2021)	2021	Nigeria	West Africa	cross-sectional	University	Not experianced	healthcare students	866	58.4	NR	NR	Low risk
42	Simegn et al.(2022)	2022	Ethiopia	East Africa	cross-sectional	University	Experianced	health professionals	412	84.7	NR	NR	Low risk
49	Fetensa et al.(2020)	2020	Ethiopia	East Africa	cross-sectional	University	Not experianced	Health Science Students	232	68.1	NR	NR	Low risk
50	Chukwu et al.(2021)	2021	Nigeria	West Africa	cross-sectional	Health facility	Experianced	HCWs	358	49.2	NR	NR	Low risk
51	Shahpawee et al.(2020)	2020	Tanzania	East Africa	cross-sectional	Institute of health science	Experianced	Institute of Health Sciences	65	76	NR	NR	Low risk
52	Babatola et al.(2020)	2020	Nigeria	West Africa	cross-sectional	University	Experianced	Physicians	326	82.7	NR	NR	Low risk
53	Seid et al.(2018)	2018	Ethiopia	East Africa	cross-sectional	University	Not experianced	paramedical students	323	12.1	96.3	NR	Low risk
55	Abera et al.(2014)	2014	Ethiopia	East Africa	cross-sectional	Hospital	Experianced	Physicians and Nurses	385	72.2	NR	NR	Low risk
56	Ngongang et al.(2021)	2021	Cameroon	Centeral africa	cross-sectional	Hospital	Experianced	physicians	98	56	NR	NR	Low risk
57	Sefah et al.(2022)	2022	Ghana	West Africa	cross-sectional	University	Not experianced	final-year nursing and physician assistantship students	160	57.5	NR	NR	Low risk
58	Abdelkarim et al.(2024)	2024	Sudan	East Africa	cross-sectional	University	Not experianced	Pharmacy Students	109	70	NR	NR	Low risk
59	Huang et al.(2023)	2023	Nigeria	West Africa	cross-sectional	Other organization	Experianced	Medical Laboratory Scientists	46	65	NR	NR	Low risk
62	Aworh et al.(2021)	2021	Nigeria	West Africa	cross-sectional	Other organization	Experianced	veterinarians	144	18.1	NR	NR	Low risk
68	BELLO et al.(2021)	2021	Nigeria	West Africa	cross-sectional	Other organization	Experianced	healthcare students	576	26.4	NR	NR	Low risk
70	Mufwambi et al.(2021)	2021	Zambia	Southern Africa	cross-sectional	Hospital	Experianced	Healthcare Professionals	304	60.4	NR	NR	Low risk
71	Mulei et al.(2020)	2020	Ethiopia	East Africa	Cross-sectional	Hospital	Experianced	Healthcare Professionals	269	51	NR	NR	Low risk
72	Sore et al.(2022)	2022	Burkina Faso	West Africa	cross-sectional	Other organization	Experianced	human health workers and veterinarians	330	60	NR	NR	Low risk
85	Djuikoue et al.(2022)	2022	Cameroon	Centeral africa	cross-sectional	Health facility	Experianced	Prescribers	100	28	89	31	Low risk
85	Djuikoue et al.(2022)	2022	Cameroon	Centeral africa	cross-sectional	Health facility	Experianced	dispensers	113	85.8	34.5	27.4	Low risk
87	Dayyab et al.(2021)	2021	Nigeria	West Africa	cross-sectional	Hospital	Experianced	nursing staff	43	37.2	NR	NR	Low risk
88	Bedekelabou et al.(2022)	2022	Togo	West Africa	cross-sectional	Health facility	Experianced	health actors	121	88	83	28	Low risk
88	Bedekelabou et al.(2022)	2022	Ivory Coast	West Africa	cross-sectional	Health facility	Experianced	health actors	100	50	76	28	Low risk
95	Akande et al.(2023)	2023	Nigeria	West Africa	cross-sectional	Pharmacy	Experianced	community pharmacists	126	70.6	NR	8.7	Low risk
97	Odetokun et al.(2019)	2019	Nigeria	West Africa	cross-sectional	University	Not experianced	Veterinary Students	413	40	NR	NR	Low risk
98	Kamita et al.(2022)	2022	Kenya	East Africa	cross-sectional	Hospital	Experianced	medical practitioners	240	42.9	NR	NR	Low risk
99	Kamoto et al.(2020)	2020	Malawi	Southern Africa	cross-sectional	University	Not experianced	medical students	72	62.5	NR	NR	Low risk
45	Babafemi et al.(2025)	2025	Kenya	East Africa	cross-sectional	Pharmacy	Experianced	NR	154	60	93	15	Low risk	NR
	Modenda et al.(2024)	2024	Zambia	Southern Africa	cross-sectional	Hospital	Experianced	health professionals	64	75	84	84	Low risk
